# Supplementary material
Source: Springer Nature journal article supplement (https://www.springermedizin.de/resource/supplementary/13633_2011_11_MOESM3_ESM.pdf/9595454)

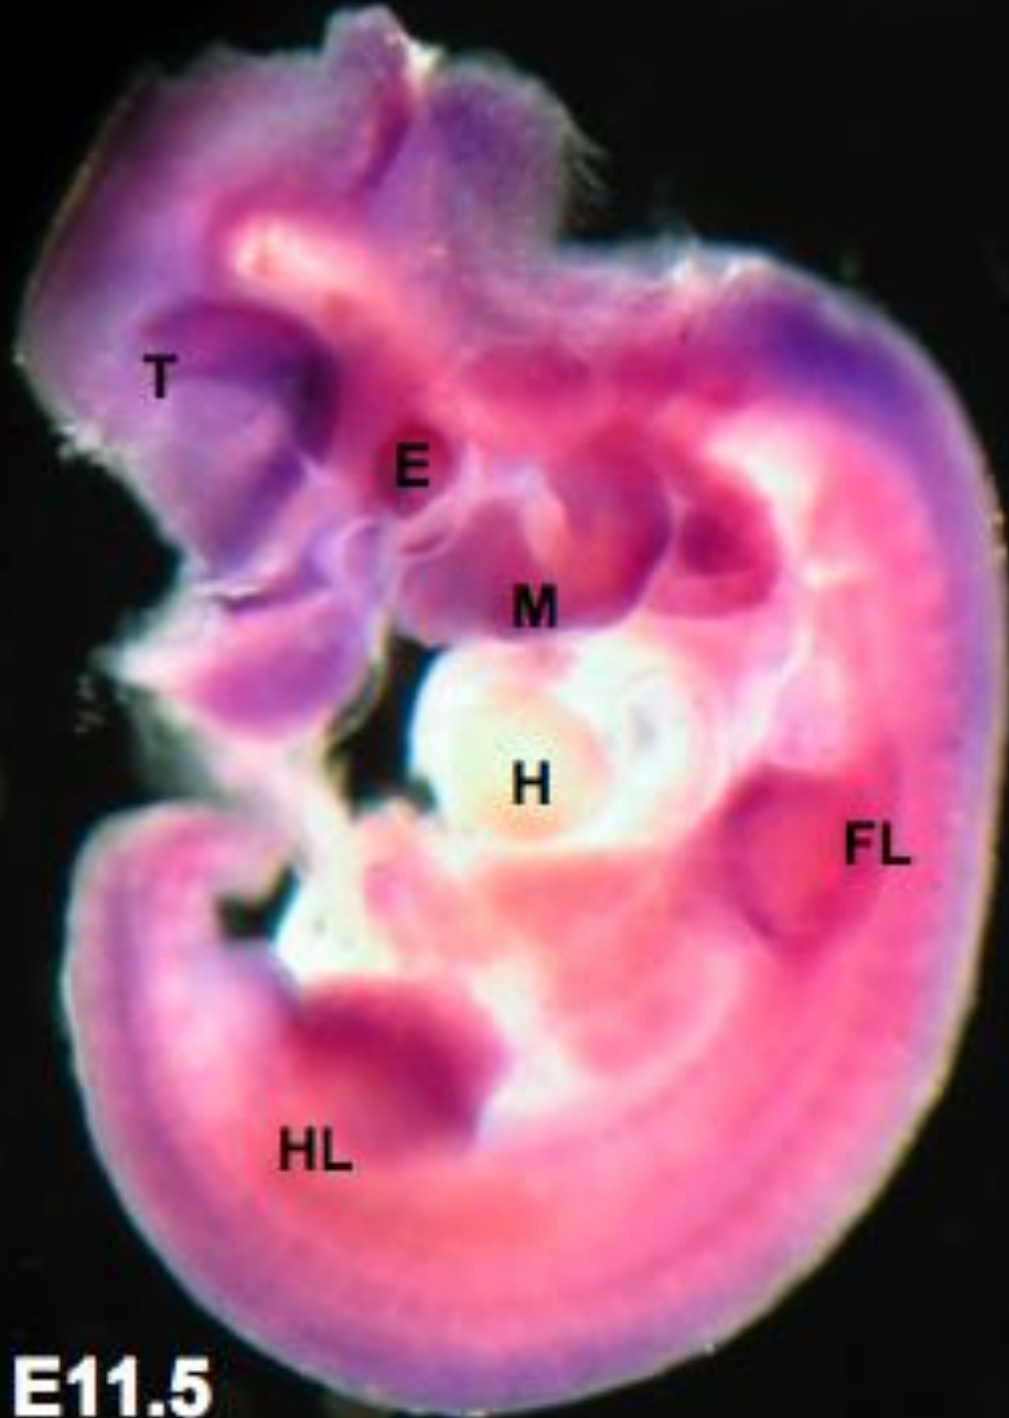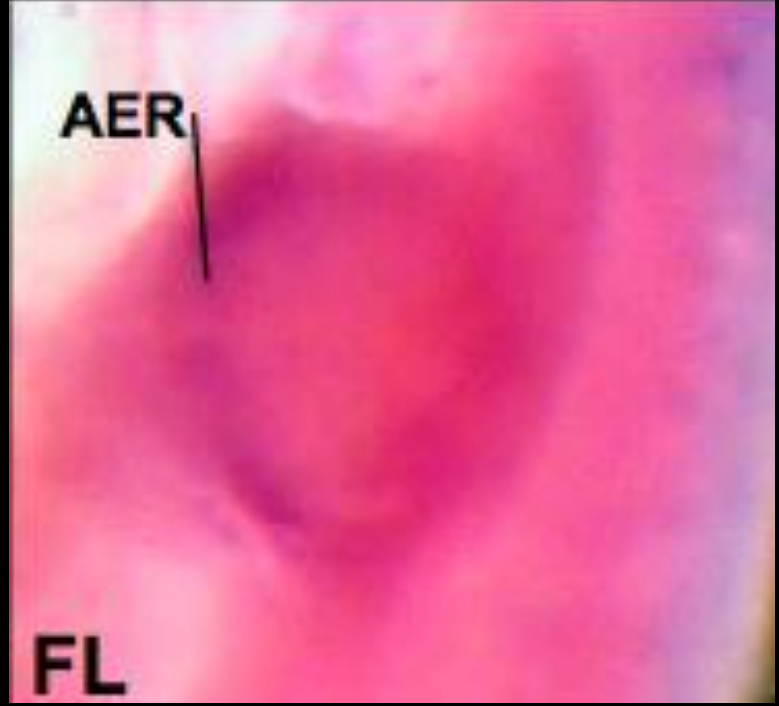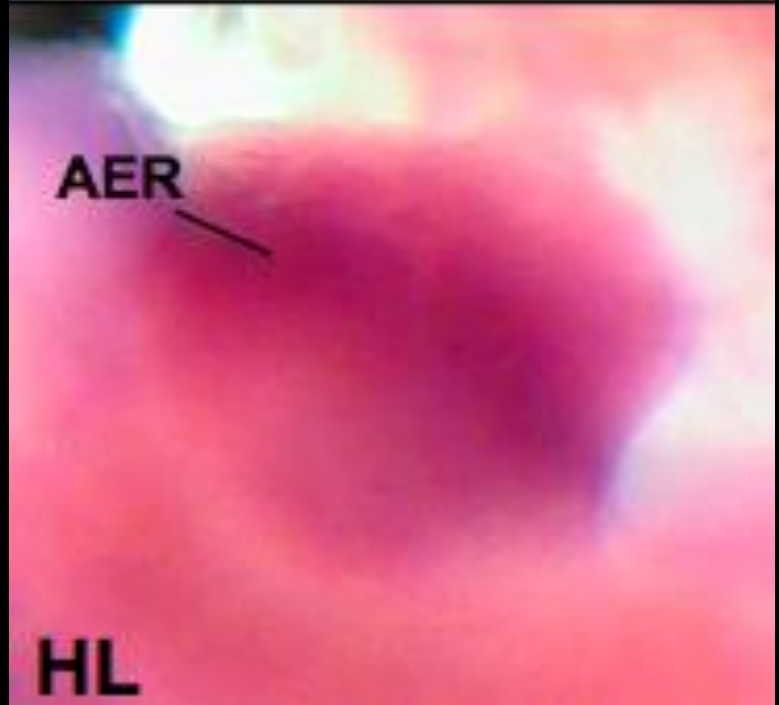

Supplement: MOESM3 [file 9595454]
